# Supplementary material
Source: PubMed Central journal article supplement (PMC4278407)
Supplement: NIHMS647460-supplement.pdf [file NIHMS647460-supplement.pdf]

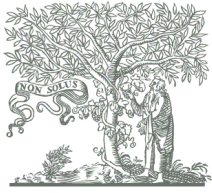

ELSEVIER

**Toxicon**  
**Conflict of Interest Policy**

Article Title: Inhibition of pancreatic tumoral  
cells by snake venom disintegrins

Author name: Amanda Hofstetter

**Declarations**

**Toxicon** requires that all authors sign a declaration of conflicting interests. If you have nothing to declare in any of these categories then this should be stated.

**Conflict of Interest**

A conflicting interest exists when professional judgement concerning a primary interest (such as patient's welfare or the validity of research) may be influenced by a secondary interest (such as financial gain or personal rivalry). It may arise for the authors when they have financial interest that may influence their interpretation of their results or those of others. Examples of potential conflicts of interest include employment, consultancies, stock ownership, honoraria, paid expert testimony, patent applications/registrations, and grants or other funding.

**Please state any competing interests**

No competing interests

**Funding Source**

All sources of funding should also be acknowledged and you should declare any involvement of study sponsors in the study design; collection, analysis and interpretation of data; the writing of the manuscript; the decision to submit the manuscript for publication. If the study sponsors had no such involvement, this should be stated.

**Please state any sources of funding for your research**

Funding for the project was provided by the NIH/Biological Materials Resource Grant, Viper Resource Grant #s 3P40OD010960-10S1 and 2P40OD010960-11A1 (NNTRC, Texas A&M University-Kingsville, Dr. E.E. Sanchez). Additional support was provided by the PPOHA instrumentation grant (Dr. E.E. Sánchez), the Robert A. Welch Foundation Department Grant, Grant number AC-0006 (TAMUK-Department of Chemistry), the United States Department of Agriculture STEP-UP Grant #2011-38422-30826 (Dr. Shad Nelson (TAMUK) and Dr. Jonda Halcomb (Del Mar College)) and the National Science Foundation, ATE Grant REVISION,DUE 1205059 (Dr. John Hatherill and Dr. Daisy Zhang), and Department of Education Title V grant DUE P031C110077. We would also like to thank Dr. Daisy Zhang (Del Mar College), Nora Diaz De Leon and Mark Hockmuller (NNTRC serpentarium curator) and all the NNTRC personnel.

**Signature** (a scanned signature is acceptable, but each author must sign)

**Print name**

Amanda Hofstetter
